# Supplementary material for: B 92 : a complete coating icosahedral B 12 core–shell structure
Source: Royal Society of Chemistry journal article supplement (doi:10.1039/d4cp03471f), 2024-11-11
Supplement: d4cp03471f1.pdf [file d4cp03471f1.pdf]

## Supporting information for

### $B_{92}$ : a complete coating icosahedral $B_{12}$ core-shell structure

Yi-Sha Chen<sup>1</sup>, Jing-Jing Guo<sup>1</sup>, Peng-Bo Liu<sup>1</sup>, Hui-Yan Zhao<sup>1\*</sup>, Jing Wang<sup>1</sup>, and Ying Liu<sup>1,2\*</sup>

<sup>1</sup>*Department of Physics and Hebei Advanced Thin Film Laboratory, Hebei Normal University, Shijiazhuang 050024, Hebei, China.*

<sup>2</sup>*State Key Laboratory for Superlattices and Microstructures, Institute of Semiconductors, Chinese Academy of Sciences, Beijing 100083, China.*

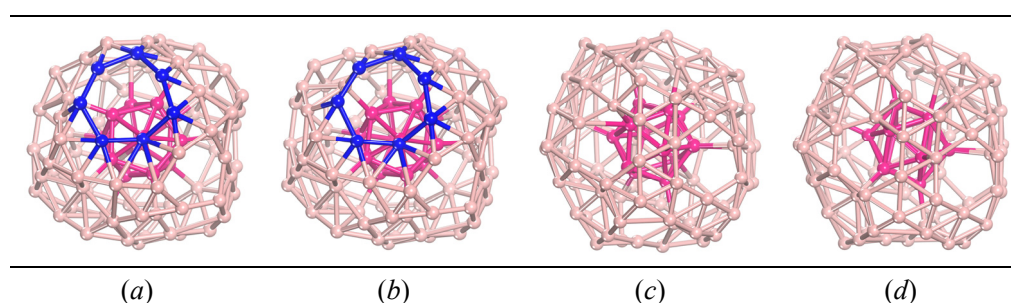

**Fig. S1** The PBE/DNP optimized structures: (a)  $B_{12}@B_{78}$ , (b)  $B_{12}@B_{79}$ , (c)  $B_{12}@B_{81}$  and (d)  $B_{12}@B_{82}$ . The interior  $B_{12}$  icosahedron in the core-shell clusters and hollow heptagon are highlighted in magenta and blue, respectively.

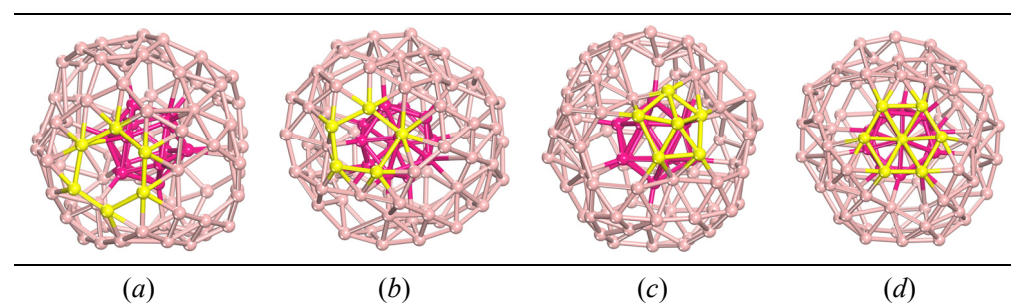

**Fig. S2** The structural unit of the outer shell for  $B_{12}@B_{80}$ : (a) hollow hexagon, (b) hollow pentagon, (c) centered pentagons and (d) centered hexagons.

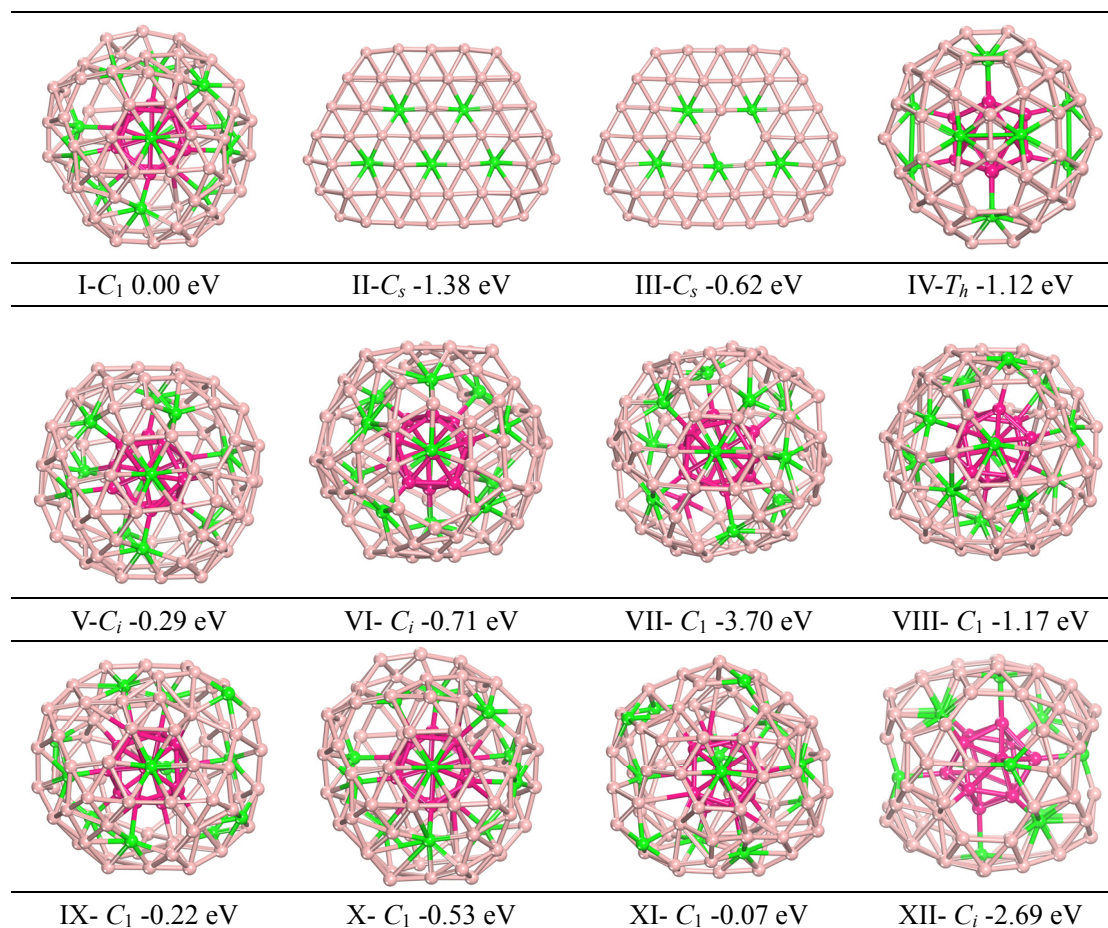

**Fig. S3** The optimized  $B_{92}$  isomers at the PBE/DNP level, with the relative binding energies (in eV) listed below. Here, the relative energy ( $\Delta E$ ) is relative to the core-shell I- $C_1$   $B_{12}@B_{80}$  structure we studied, which is calculated as follows:  $E_b = E(B_{12}@B_{80}) - 92 * E(B)$ ,  $\Delta E = E_b(isomer) - E_b(I-C_1 B_{12}@B_{80})$ . A typical  $B_{92}$  isomer was the highly symmetrical IV- $T_h$   $B_{12}@B_{80}$  structure, which was constructed based on  $C_{60}$  fullerenes. 20 B atoms are added to the center of 20 hexagons of  $B_{60}$ . Among them, 12 B atoms are slightly concave inward and bond with the internal  $B_{12}$  icosahedron. These 12 inward-concave boron atoms are in the same position as the 12 slightly inward-concave B atoms in  $T_h$   $B_{96}$ . The calculated results show that the binding energies of  $T_h$   $B_{12}@B_{80}$  is 1.12 eV lower than that of the I- $C_1$   $B_{12}@B_{80}$  structure we studied.

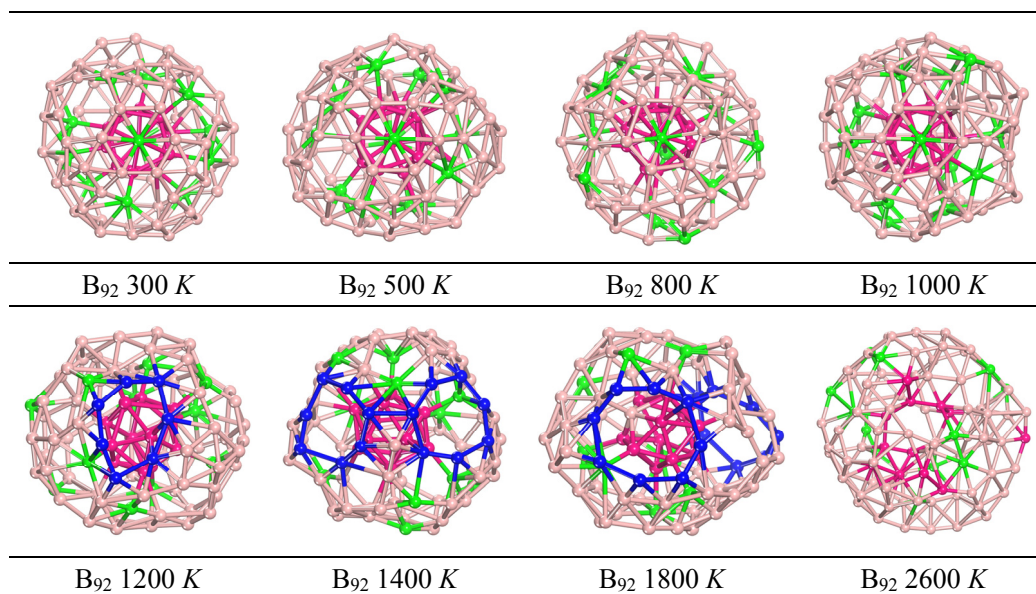

**Fig. S4** The structures of the core-shell  $B_{12}@B_{80}$  at temperature 300, 500, 800, 1000, 1200, 1400, 1800, and 2600 K, respectively.

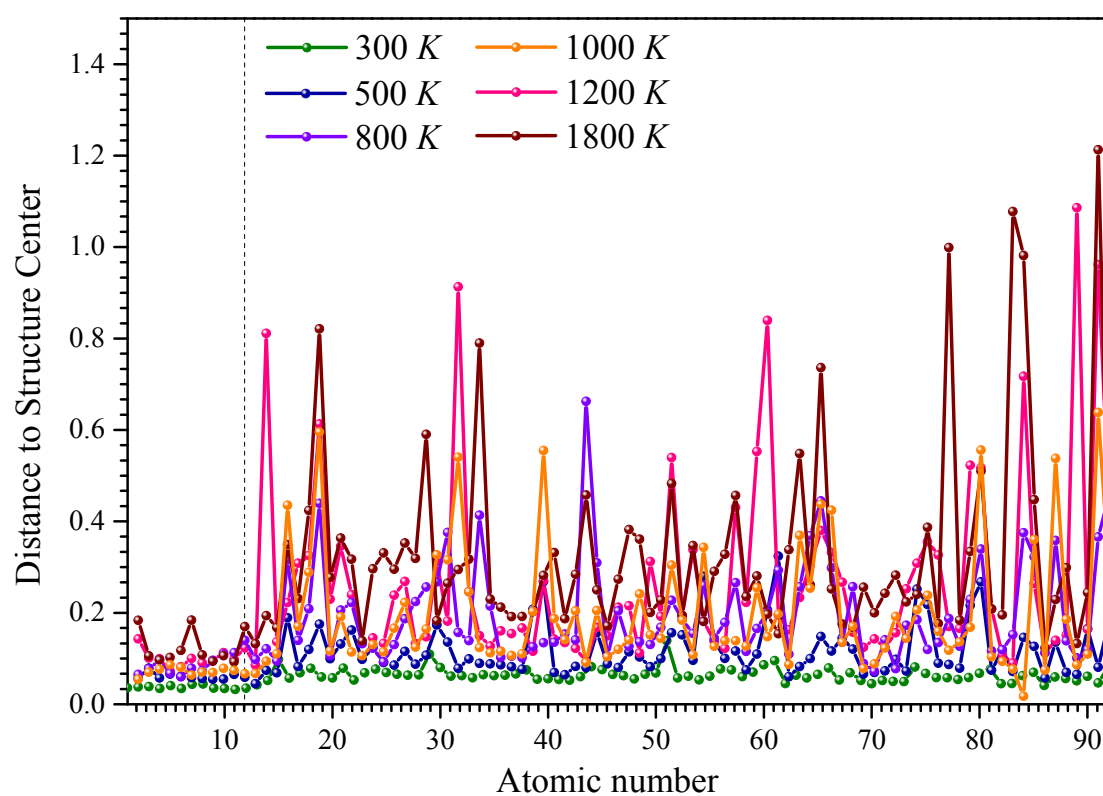

**Fig. S5** The average displacement of individual atoms relative to the center of the  $B_{12}@B_{80}$  system for various temperatures. The  $B_{12}$  core atoms in the  $B_{12}@B_{80}$  structure are numbered 1 to 12, while atoms 13 to 92 correspond to the  $B_{80}$  shell. The left side of the dashed black line corresponds to the average displacement curve of the core atoms, while the right side indicates the average displacement curve of the shell atoms.

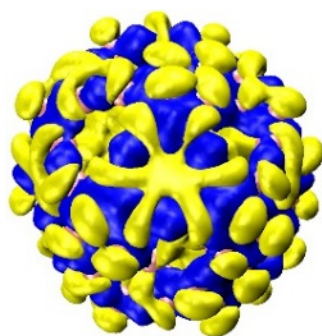

**Fig. S6** Deformation electron density of  $B_{12}@B_{80}$  structure, with the isovalue of  $0.006 e/\text{\AA}^3$ .

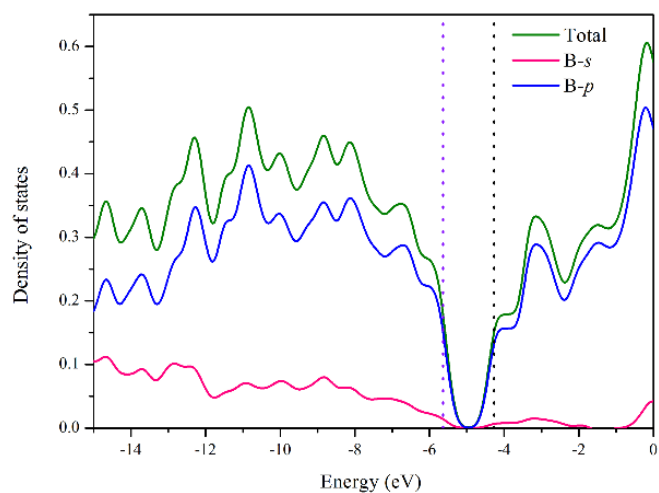

**Fig. S7** The total and partial density of states of  $B_{12}@B_{80}$  structure. The HOMO (purple) and LUMO (black) levels are shown by dashed lines.

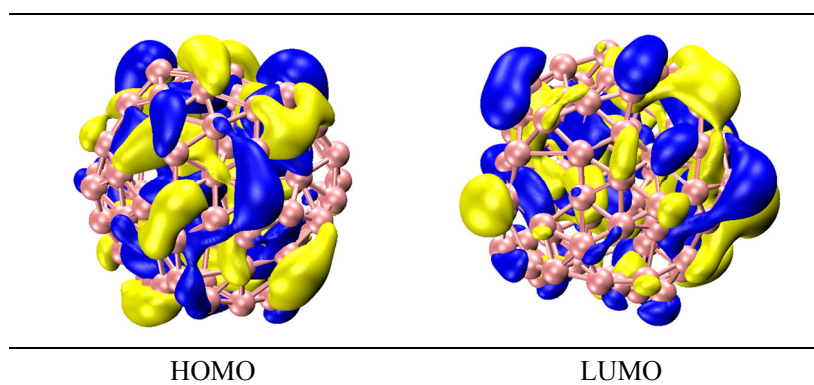

HOMO

LUMO

**Fig. S8** HOMO and LUMO frontier molecular orbitals for the core-shell  $B_{12}@B_{80}$  structure, with an isosurface of  $0.015 e/\text{\AA}^3$ .

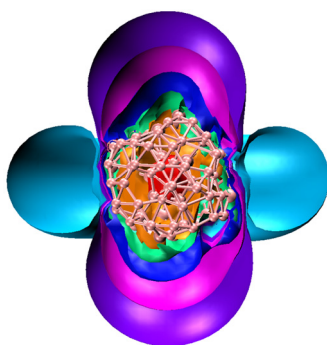

**Fig. S9** ICSS<sub>ZZ</sub> of the core-shell B<sub>12</sub>@B<sub>80</sub> structure at different isosurfaces. Color scheme: red 64 ppm shielding, orange 32 ppm shielding, green 16 ppm shielding, blue 8 ppm shielding, magenta 4 ppm shielding, violet 2 ppm shielding, cyan -1.5 ppm deshielding for B<sub>12</sub>@B<sub>80</sub> structure (note that the ICSS and NICS values are opposite in sign).

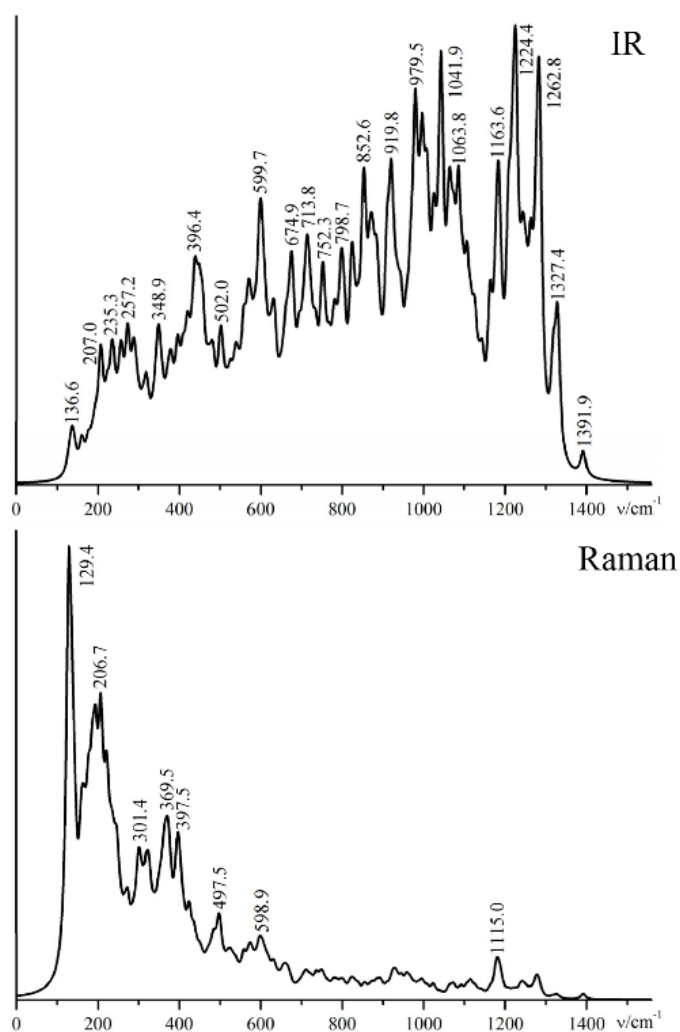

**Fig. S10** Simulated IR and Raman spectrum of B<sub>12</sub>@B<sub>80</sub> structure. For Raman spectrum, the incident light and incident temperature are set to 488 nm and 300 K, respectively. The Lorentzian smearing is set to 30.00 cm<sup>-1</sup>.

**Table S1.** Cartesian coordinates of the core-shell B<sub>12</sub>@B<sub>80</sub> structure.

| Atoms | Number | X      | Y      | Z      | Atoms | Number | X      | Y      | Z      |
|-------|--------|--------|--------|--------|-------|--------|--------|--------|--------|
| B     | 1      | 2.930  | -0.443 | 1.605  | B     | 47     | 3.321  | -2.190 | -0.746 |
| B     | 2      | 3.198  | -2.232 | 2.048  | B     | 48     | 2.679  | -2.672 | -2.264 |
| B     | 3      | 1.489  | -2.270 | 2.536  | B     | 49     | 1.328  | -3.575 | -2.355 |
| B     | 4      | 0.569  | -3.680 | 2.009  | B     | 50     | -0.241 | -1.028 | -3.151 |
| B     | 5      | -1.064 | -3.440 | 1.824  | B     | 51     | 1.349  | -0.382 | -3.698 |
| B     | 6      | -1.855 | -3.045 | 0.290  | B     | 52     | 2.670  | -1.107 | -3.103 |
| B     | 7      | -3.562 | -2.688 | 0.459  | B     | 53     | 4.070  | 0.958  | 2.135  |
| B     | 8      | -4.236 | -1.905 | -0.803 | B     | 54     | 2.114  | -3.409 | 1.375  |
| B     | 9      | -4.370 | -0.200 | -0.687 | B     | 55     | -2.700 | -3.188 | 1.735  |
| B     | 10     | -2.941 | 0.442  | -1.559 | B     | 56     | -3.803 | -0.978 | -2.063 |
| B     | 11     | -2.830 | 2.091  | -1.923 | B     | 57     | -2.162 | 3.608  | -1.850 |
| B     | 12     | -1.713 | 2.612  | -3.062 | B     | 58     | 2.687  | 3.324  | -1.857 |
| B     | 13     | -0.548 | 3.572  | -2.178 | B     | 59     | 0.227  | 3.883  | 2.244  |
| B     | 14     | 1.063  | 3.426  | -2.013 | B     | 60     | -3.932 | 1.462  | 2.116  |
| B     | 15     | 2.012  | 3.818  | -0.470 | B     | 61     | 0.013  | -0.540 | 4.419  |
| B     | 16     | 3.328  | 2.594  | -0.416 | B     | 62     | -0.295 | -3.761 | -2.414 |
| B     | 17     | 4.255  | 1.773  | 0.779  | B     | 63     | -0.132 | 0.565  | -3.940 |
| B     | 18     | 4.372  | 0.077  | 0.590  | B     | 64     | 3.913  | -1.557 | -2.164 |
| B     | 19     | 3.092  | 0.380  | 3.275  | B     | 65     | -0.19  | -2.291 | 2.797  |
| B     | 20     | 1.587  | 2.967  | 2.242  | B     | 66     | 2.616  | -1.232 | 3.221  |
| B     | 21     | 1.211  | 4.061  | 0.952  | B     | 67     | -4.104 | -1.074 | 0.746  |
| B     | 22     | -0.760 | 4.189  | 0.984  | B     | 68     | -2.851 | -2.763 | -1.243 |
| B     | 23     | -1.511 | 3.991  | -0.422 | B     | 69     | -2.538 | 1.180  | -3.348 |
| B     | 24     | -3.010 | 3.103  | -0.494 | B     | 70     | 0.061  | 1.945  | -2.624 |
| B     | 25     | -3.597 | 2.403  | 0.835  | B     | 71     | 1.961  | 2.526  | 0.657  |
| B     | 26     | -4.306 | 0.613  | 0.719  | B     | 72     | 4.265  | 1.137  | -0.751 |
| B     | 27     | -3.811 | -0.197 | 2.125  | B     | 73     | 1.688  | 1.499  | 3.189  |
| B     | 28     | -1.960 | -2.487 | 2.986  | B     | 74     | -1.769 | 2.645  | 0.749  |
| B     | 29     | -1.209 | -1.510 | 3.987  | B     | 75     | -2.239 | -0.784 | 2.595  |
| B     | 30     | 1.569  | -0.077 | 3.975  | B     | 76     | 4.045  | -1.608 | 0.721  |
| B     | 31     | 0.131  | 0.850  | 3.430  | B     | 77     | 1.777  | -2.922 | -0.484 |
| B     | 32     | 0.100  | 2.359  | 2.899  | B     | 78     | -1.854 | -1.688 | -3.421 |
| B     | 33     | -1.334 | 3.373  | 2.389  | B     | 79     | 2.256  | 0.438  | -2.384 |
| B     | 34     | -2.669 | 2.460  | 2.338  | B     | 80     | 1.145  | -1.999 | -3.074 |
| B     | 35     | -2.732 | 0.835  | 3.124  | B     | 81     | 1.317  | 0.085  | -0.948 |
| B     | 36     | -1.442 | 0.176  | 3.923  | B     | 82     | -1.538 | 0.048  | -0.639 |
| B     | 37     | 1.112  | -4.251 | 0.513  | B     | 83     | 0.200  | -1.162 | 1.358  |
| B     | 38     | 0.481  | -4.148 | -1.003 | B     | 84     | 0.150  | 0.557  | 1.599  |
| B     | 39     | -1.257 | -3.552 | -1.119 | B     | 85     | -1.320 | -0.287 | 1.141  |
| B     | 40     | -1.821 | -3.118 | -2.614 | B     | 86     | 0.914  | 1.297  | 0.251  |
| B     | 41     | -3.057 | -0.399 | -3.395 | B     | 87     | -0.856 | -1.537 | -0.026 |
| B     | 42     | -1.540 | -0.188 | -3.957 | B     | 88     | 0.874  | -1.474 | -0.239 |
| B     | 43     | 1.246  | 1.322  | -3.915 | B     | 89     | -0.863 | 1.280  | 0.417  |
| B     | 44     | 2.080  | 2.290  | -2.992 | B     | 90     | 1.541  | -0.193 | 0.777  |
| B     | 45     | 3.329  | 1.704  | -1.923 | B     | 91     | -0.106 | 1.005  | -1.174 |
| B     | 46     | 4.450  | -0.950 | -0.759 | B     | 92     | -0.156 | -0.743 | -1.418 |
